# Supplementary material for: A visible-light-active CuInSe2:Zn/g-C3N4/TiO2 nanowires for photoelectrocatalytic bactericidal effects
Source: Royal Society of Chemistry journal article supplement (doi:10.1039/c9nj04320a), 2020-01-01
Supplement: c9nj04320a1.pdf [file c9nj04320a1.pdf]

## A visible-light-active CuInSe<sub>2</sub>: Zn/g-C<sub>3</sub>N<sub>4</sub>/TiO<sub>2</sub> nanowires for photoelectrocatalytic bactericidal effects

Jiang Ning,<sup>a</sup> Geng Hongchao,<sup>a</sup> Qiao Yan,<sup>a</sup> Zhu Xingqi,<sup>a</sup> Chenyi Li<sup>a</sup> and Qingyun Cai<sup>\*a</sup>

<sup>a</sup>State Key Laboratory of Chemo/Biosensing and Chemometrics, College of Chemistry and Chemical Engineering, Hunan University, Changsha 410082, China.

\*E-mail: qycail0001@hnu.edu.cn

### Supporting Information (SI):

The inactivation rate constant  $k$  of the Click model was used to evaluate the results of this method and other published approaches; one of the most commonly used models for TiO<sub>2</sub> inactivation kinetics of microbes<sup>1,2</sup>. The model is expressed by the following equation:

$$\ln \frac{N_t}{N_0} = -kt + b \quad (1)$$

where  $N_t$  is the remaining concentration at time  $t$  (cfu/mL);  $N_0$  is the initial concentration;  $k$  is the photokilling constant (min<sup>-1</sup>);  $b$  is a constant. Compared with the other methods, it shows a significant photoelectrocatalytic bactericidal effect (Table S1).

Table S1. Comparison of the corresponding kinetic constants and regression coefficients

| photoelectrode                                                                 | $k$ (min <sup>-1</sup> ) | R <sup>2</sup> | Ref.      |
|--------------------------------------------------------------------------------|--------------------------|----------------|-----------|
| CuInSe <sub>2</sub> : Zn/g-C <sub>3</sub> N <sub>4</sub> /TiO <sub>2</sub> NWs | 0.095                    | 0.998          | This work |
| CdS/Pt-TiO <sub>2</sub> NTs                                                    | 0.0446                   | 0.998          | 3         |
| 100% {1 1 1} faceted rutile TiO <sub>2</sub> photoanode                        | 0.0543                   | 0.994          | 4         |
| Ag-CNT/TiO <sub>2</sub>                                                        | 0.0610                   | 0.945          | 5         |

## Reference

1. T. Li, S. Luo, Y. Luo and L. Yang, *Materials Letters*, 2016, **180**, 130-134.
2. J. H. Melián, J. D. Rodríguez, A. V. Suárez, E. T. Rendón, C. V. Do Campo, J. Arana and J. P. J. C. Peña, 2000, **41**, 323-327.
3. Q. Kang, Q. Z. Lu, S. H. Liu, L. X. Yang, L. F. Wen, S. L. Luo and Q. Y. Cai, *Biomaterials*, 2010, **31**, 3317-3326.
4. X. Liu, H. Zhang, C. Liu, J. Chen, G. Li, T. An, P.-K. Wong and H. Zhao, *Catalysis Today*, 2014, **224**, 77-82.
5. F.-J. Zhang, M.-L. Chen and W.-C. Oh, *Composites Science and Technology*, 2011, **71**, 658-665.
